# Supplementary material for: Generalized joint hypermobility among school-aged children in Majmaah region, Saudi Arabia
Source: PeerJ. 2020 Aug 11;8:e9682. doi: 10.7717/peerj.9682 (PMC7427539; doi:10.7717/peerj.9682)
Supplement: Supplemental Information 1 [file peerj-08-9682-s001.xlsx]

## Sheet: RAW DATA
	No	S.No	Age	Gender	Height	weight	Han-Dom	BMI	Li_Fing_Lt	Li_Fing_Rt	Thum_Lt	Thum_Rt	Elbow_Lt	Elbow_Rt	Knee_Lt	Knee_Rt	Trunk	Score	Score 4 or more	Score 6 or More
1	1	KS M 004	10	1	143	59	1	28.8523	0	0	0	0	1	1	0	0	0	2	0	0
2	2	KS M 005	12	1	136	46	2	24.8702	0	0	0	0	0	0	0	0	0	0	0	0
3	3	KS M 006	14	1	140	47	2	23.9796	0	0	0	0	0	0	0	0	0	0	0	0
4	4	KS M 008	13	1	143.5	43.5	2	21.1245	0	0	0	0	0	0	0	0	0	0	0	0
5	5	KS M 009	12	1	154.5	78.4	2	32.8442	0	0	0	0	0	0	0	0	0	0	0	0
6	6	KS M 010	12	1	146.5	59	2	27.4901	0	0	0	0	0	0	0	0	0	0	0	0
7	7	KS M 011	12	1	144.5	37.9	2	18.1511	0	0	0	0	0	0	0	0	0	0	0	0
8	8	KS M 012	12	1	146	36.3	2	17.0295	0	0	0	0	1	1	0	0	0	2	0	0
9	9	KS M 013	12	1	143	62	1	30.3193	0	0	0	0	0	0	0	0	0	0	0	0
10	10	KS M 014	11	1	149.5	45.2	2	20.2235	0	0	0	0	0	0	0	0	0	0	0	0
11	11	KS M 015	12	1	141	32.4	2	16.297	0	0	0	0	0	0	0	0	0	0	0	0
12	12	KS M 021	8	1	113	17.2	2	13.4701	0	0	0	0	0	0	0	0	0	0	0	0
13	13	KS M 026	11	1	134.5	32	2	17.6891	0	0	0	0	0	0	0	0	0	0	0	0
14	14	KS M 027	11	1	134	32.6	2	18.1555	0	0	0	0	0	0	0	0	0	0	0	0
15	15	KS M 028	11	1	133	31.4	2	17.7511	0	0	0	0	0	0	0	0	0	0	0	0
16	16	KS M 025	12	1	149	34	2	15.3146	0	0	0	0	0	0	0	0	0	0	0	0
17	17	KS M 029	11	1	131	34.5	2	20.1037	0	0	0	0	0	0	0	0	0	0	0	0
18	18	KS M 018	13	1	152.5	65	1	27.9495	0	0	0	0	0	0	0	0	0	0	0	0
19	19	KS M 019	12	1	138.5	27.3	2	14.2319	0	0	0	0	0	0	0	0	0	0	0	0
20	20	KS M 024	12	1	142.5	36.8	2	18.1225	0	0	0	0	0	0	0	0	0	0	0	0
21	21	KS M 039	11	1	132.5	28	2	15.9487	0	0	0	0	0	0	0	0	0	0	0	0
22	22	KS M 037	11	1	136	31.9	2	17.247	0	0	0	0	0	0	0	0	0	0	0	0
23	23	KS M 036	12	1	137	40.1	2	21.365	0	0	0	0	0	0	0	0	0	0	0	0
24	24	KS M 003	12	1	133.5	32.4	2	18.1795	0	0	0	0	0	0	0	0	0	0	0	0
25	25	KS M 001	11	1	129	49.6	2	29.8059	0	0	0	0	0	0	0	0	0	0	0	0
26	26	KS M 007	12	1	139	26.1	1	13.5086	0	0	0	0	0	0	0	0	0	0	0	0
27	32	KS M 034	12	1	16.5	36	2	1322.31	0	0	0	0	0	0	0	0	0	0	0	0
28	33	KS M 039	11	1	141.2	39.9	2	20.0126	1	1	1	1	0	0	1	1	0	6	1	1
29	34	KS M 038	11	1	143	28.3	2	13.8393	1	1	1	1	1	1	0	0	0	6	1	1
30	37	KS M 023	12	1	143	30.6	2	14.9641	0	0	0	0	0	0	0	0	0	0	0	0
31	38	KS M 032	11	1	131.5	29.3	2	16.944	0	0	0	0	0	0	0	0	0	0	0	0
32	39	KS M 033	11	1	135	29.7	2	16.2963	1	1	1	1	1	1	0	0	0	6	1	1
33	40	KS M 022	12	1	145	50	2	23.7812	0	0	0	0	0	0	0	0	0	0	0	0
34	41	KS M 030	12	1	130	36.3	2	21.4793	0	0	0	0	0	0	0	0	0	0	0	0
35	42	KS M 035	12	1	128	48.9	2	29.8462	0	0	0	0	0	0	1	1	0	2	0	0
36	43	KS M 016	13	1	134.5	46.2	2	25.5386	0	0	0	0	0	0	0	0	0	0	0	0
37	44	KS M 017	12	1	131	33.6	2	19.5793	0	0	0	0	0	0	0	0	0	0	0	0
38	51	BK M 025	10	1	147	43.5	2	20.1305	1	1	1	1	1	1	1	1	0	8	1	1
39	52	BK M 030	10	1	144	43	2	20.7369	0	0	0	0	0	0	0	0	0	0	0	0
40	53	BK M 001	10	1	141	27.8	2	13.9832	0	0	0	0	0	0	0	0	0	0	0	0
41	55	BK M 005	10	1	131	24.3	2	14.16	1	1	0	0	0	0	0	0	0	2	0	0
42	56	BK M 006	10	1	142	24.8	2	12.2991	0	0	0	0	0	0	0	0	0	0	0	0
43	57	BK M 007	10	1	140	30	2	15.3061	1	1	0	0	0	0	0	0	0	2	0	0
44	58	BK M 008	10	1	145	45.6	2	21.6885	0	0	1	1	1	1	0	0	0	4	1	0
45	59	BK M 009	10	1	138	51.3	2	26.9376	0	0	0	0	0	0	0	0	0	0	0	0
46	60	BK M 010	10	1	130	49	2	28.9941	0	0	0	0	0	0	0	0	0	0	0	0
47	61	BK M 011	10	1	139	35	1	18.115	1	1	0	0	1	1	0	0	0	4	1	0
48	62	BK M 012	10	1	135	40	2	21.9479	0	0	0	0	0	0	0	0	0	0	0	0
49	63	BK M 066	10	1	124	26	2	16.9095	0	0	0	0	0	0	0	0	0	0	0	0
50	64	BK M 060	10	1	138	32	1	16.8032	0	0	0	0	0	0	0	0	0	0	0	0
51	1	TW M 004	12	1	143	37.7	2	18.4361	0	0	0	0	0	0	0	0	0	0	0	0
52	2	KS M 026	12	1	140	75.4	2	38.4694	0	0	0	0	0	0	0	0	0	0	0	0
53	3	KS M 020	12	1	151	53.1	2	23.2885	0	0	0	0	0	0	0	0	0	0	0	0
54	4	KS M 031	11	1	127	24.4	2	15.128	0	0	0	0	0	0	0	0	0	0	0	0
55	5	KS M 002	12	1	138	40.2	2	21.109	1	1	1	1	1	1	1	1	0	8	1	1
56	6	TW M 012	9	1	118	22.8	2	16.3746	0	0	0	0	0	0	0	0	0	0	0	0
57	7	TW M 014	9	1	120	22.2	2	15.4167	0	0	0	0	0	0	0	0	0	0	0	0
58	8	TW M 013	9	1	128	26.2	2	15.9912	0	0	0	0	0	0	0	0	0	0	0	0
59	9	TW M 025	9	1	115	20.1	2	15.1985	0	0	0	0	0	0	0	0	0	0	0	0
60	10	TW M 009	9	1	126	26.1	2	16.4399	1	1	0	0	0	0	0	0	0	2	0	0
61	11	TM M 043	9	1	136	35	2	18.923	0	0	0	0	0	0	0	0	0	0	0	0
62	12	TW M 037	9	1	118	23	2	16.5182	0	0	0	0	0	0	0	0	0	0	0	0
63	13	TW M 031	9	1	131	27	2	15.7333	0	0	0	0	0	0	0	0	0	0	0	0
64	14	BK M 017	9	1	129	24.7	2	14.8429	0	0	0	0	0	0	0	0	0	0	0	0
65	15	BK M 004	9	1	143	29	2	14.1816	0	0	0	0	1	1	0	0	0	2	0	0
66	16	BK M 003	9	1	133.5	30.5	2	17.1134	0	0	0	0	0	0	0	0	0	0	0	0
67	17	TW M 002	12	1	127.5	26.6	2	16.3629	0	0	0	0	0	0	0	0	0	0	0	0
68	18	TW M 005	12	1	147.5	38.4	2	17.6501	0	0	0	0	0	0	0	0	0	0	0	0
69	19	TW M 006	12	1	139.5	57.1	2	29.3419	0	0	0	0	0	0	0	0	0	0	0	0
70	20	TW M 019	12	1	126.5	61.8	2	38.6196	0	1	0	0	0	0	0	0	0	1	0	0
71	21	TW M 020	12	1	144	48.8	2	23.534	0	0	0	0	0	0	0	0	0	0	0	0
72	22	TW M 001	12	1	144	42	2	20.2546	1	1	0	0	0	0	0	0	0	2	0	0
73	23	TW M 054	12	1	133	30.2	2	17.0728	0	0	0	0	0	0	0	0	0	0	0	0
74	24	TW M 050	12	1	136	32.4	2	17.5173	0	0	0	0	0	0	0	0	0	0	0	0
75	25	BK M 026	12	1	141	35.5	2	17.8562	0	0	0	0	0	0	0	0	0	0	0	0
76	26	BK M 046	12	1	140	68	2	34.6939	0	0	0	0	0	0	0	0	0	0	0	0
77	27	BK M 034	12	1	133	37	2	20.917	0	0	0	0	0	0	1	1	0	2	0	0
78	28	BK M 031	12	1	147	33	2	15.2714	1	1	0	0	0	0	0	0	0	2	0	0
79	29	TW M 059	12	1	137	37.8	2	20.1396	0	0	0	0	0	0	0	0	0	0	0	0
80	30	BK M 041	13	1	149	47	2	21.1702	0	0	0	0	0	0	0	0	0	0	0	0
81	31	TW M 008	13	1	146	35.5	2	16.6542	0	0	0	0	0	0	0	0	0	0	0	0
82	32	TW M 028	12	1	143	43	2	21.0279	0	0	0	0	0	0	0	0	0	0	0	0
83	41	TW M 024	8	1	114	21.2	2	16.3127	0	1	0	0	0	0	0	0	0	1	0	0
84	42	TW M 026	8	1	119.5	20.4	2	14.2855	0	1	0	0	1	1	1	1	0	5	1	0
85	43	TW M 0 27	8	1	124.5	27.1	2	17.4836	0	1	0	0	0	0	0	0	0	1	0	0
86	44	TW M 018	8	1	141	27.8	2	13.9832	0	0	0	0	0	0	0	0	0	0	0	0
87	45	TW M017	8	1	125	26.2	1	16.768	0	0	0	0	0	0	0	0	0	0	0	0
88	46	TW M 021	11	1	131	42	1	24.4741	0	0	0	0	0	0	0	0	0	0	0	0
89	47	TW M 003	11	1	138.5	32.5	2	16.9427	0	0	0	0	0	0	0	0	0	0	0	0
90	48	TW M 029	11	1	140.5	41.7	1	21.1244	0	0	0	0	0	0	0	0	0	0	0	0
91	49	TW M 007	11	1	144	32.2	2	15.5285	0	0	0	0	0	0	0	0	0	0	0	0
92	50	BK M 027	11	1	135	28	2	15.3635	0	0	0	0	1	1	0	0	0	2	0	0
93	51	BK M 033	11	1	141	37	2	18.6107	0	0	0	0	0	0	0	0	0	0	0	0
94	52	BK M 035	11	1	151	40	2	17.5431	0	0	0	0	0	0	0	0	0	0	0	0
95	53	BK M 032	11	1	135	35	2	19.2044	0	0	0	0	0	0	0	0	0	0	0	0
96	54	BK M 036	11	1	140	59	2	30.102	1	1	0	0	1	1	0	0	0	4	1	0
97	55	BK M 032	11	1	150	40	2	17.7778	1	1	0	0	1	1	0	0	0	4	1	0
98	56	BK M 037	11	1	144	37	2	17.8434	1	1	0	0	1	1	0	0	0	4	1	0
99	57	BK M 038	11	1	131	29	2	16.8988	0	0	0	0	0	0	0	0	0	0	0	0
100	58	BK M 039	11	1	141	35	2	17.6047	1	1	0	0	1	1	0	0	0	4	1	0
101	59	BK M 040	11	1	140	35	2	17.8571	1	1	0	0	1	1	1	1	0	6	1	1
102	60	BK M 042	11	1	135	28	2	15.3635	0	0	0	0	0	0	0	0	0	0	0	0
103	61	BK M 043	11	1	146	70	2	32.8392	0	0	0	0	0	0	0	0	0	0	0	0
104	62	BK M 045	11	1	130	40	2	23.6686	0	0	0	0	0	0	0	0	0	0	0	0
105	63	BK M 044	11	1	150	36	2	16	0	0	0	0	1	1	0	0	0	2	0	0
106	64	BK M 048	11	1	143	53	2	25.9181	0	0	0	0	0	0	1	0	0	1	0	0
107	65	BK M 050	11	1	139	35	2	18.115	0	0	0	0	0	0	0	0	0	0	0	0
108	66	BK M 049	11	1	144	34	2	16.3966	0	0	0	0	1	1	0	0	0	2	0	0
109	67	BK M 051	11	1	149	60	2	27.0258	0	0	0	0	0	0	0	0	0	0	0	0
110	68	BK M 052	11	1	140	53	2	27.0408	0	0	0	0	0	0	0	0	0	0	0	0
111	69	BK M 053	11	1	142	30	2	14.878	1	1	0	0	1	1	0	0	0	4	1	0
112	70	BK M 054	11	1	134	30	2	16.7075	1	1	0	0	1	1	0	0	0	4	1	0
113	71	BK M 055	11	1	138	40	2	21.004	0	0	0	0	1	1	0	0	0	2	0	0
114	72	BK M 056	11	1	143	30	2	14.6706	0	0	0	0	0	0	0	0	0	0	0	0
115	73	BK M 057	11	1	152	60	2	25.9695	0	0	0	0	0	0	0	0	0	0	0	0
116	74	BK M 061	11	1	145	30	2	14.2687	1	1	0	0	1	1	0	0	0	4	1	0
117	75	BK M 063	10	1	138	43	2	22.5793	1	1	0	0	0	0	1	1	0	4	1	0
118	76	BK M 065	11	1	138	43	2	22.5793	0	0	0	0	0	0	0	0	0	0	0	0
119	77	BK M 024	11	1	137	27.6	2	14.7051	0	0	0	0	1	1	0	0	0	2	0	0
120	78	BK M 029	11	1	135	33	2	18.107	0	0	0	0	0	0	0	0	0	0	0	0
121	79	BK M 023	11	1	137	43	1	29	0	0	0	0	0	0	0	0	0	0	0	0
122	80	TW M 034	11	1	133	39	2	22.0476	1	1	1	1	1	1	0	0	0	6	1	1
123	81	TW M 053	11	1	138	32.5	2	17.0657	0	0	0	0	0	0	0	0	0	0	0	0
124	82	TW M 055	11	1	143	59.8	2	29.2435	0	0	0	0	0	0	0	0	0	0	0	0
125	83	TW M 056	11	1	147	53.9	2	24.9433	0	0	0	0	0	0	0	0	0	0	0	0
126	84	TW M 057	11	1	136	32	2	17.301	0	0	0	0	0	0	0	0	0	0	0	0
127	85	TW M 058	11	1	130	29	2	17.1598	0	0	0	0	0	0	0	0	0	0	0	0
128	86	TW M 060	11	1	136	40.4	2	21.8426	0	0	0	0	0	0	0	0	0	0	0	0
129	87	TW M 061	11	1	125	31.2	2	19.968	0	0	0	0	0	0	0	0	0	0	0	0
130	88	TW M 062	11	1	141	36.9	2	18.5604	1	1	0	0	1	1	0	0	0	4	1	0
131	89	TW M 063	11	1	141.5	32.5	2	16.2319	0	0	0	0	0	0	0	0	0	0	0	0
132	1	5F 036	12	2	155	48	2	19.9792	0	0	0	0	0	0	0	0	0	0	0	0
133	2	5F 037	12	2	152	43	2	18.6115	0	0	0	0	0	0	0	0	0	0	0	0
134	3	5F 038	12	2	145	43	2	20.4518	0	0	0	0	0	0	0	0	0	0	0	0
135	4	5F 039	12	2	143	42	2	20.5389	0	0	0	0	0	0	0	0	0	0	0	0
136	5	5F 040	12	2	140	33	2	16.8367	0	0	0	0	0	0	0	0	0	0	0	0
137	6	5F 041	12	2	140	30	2	15.3061	0	0	1	1	1	1	0	0	0	4	1	0
138	7	5F 042	12	2	135	29	2	15.9122	0	0	0	0	0	0	0	0	0	0	0	0
139	8	5F 043	12	2	152	60	2	25.9695	0	0	0	0	0	0	0	0	0	0	0	0
140	9	5F 044	12	2	154	41	2	17.2879	0	0	0	0	0	0	0	0	0	0	0	0
141	10	5F 045	12	2	134	32	2	17.8213	0	0	0	0	0	0	0	0	0	0	0	0
142	11	5F 046	12	2	158	51	2	20.4294	0	0	0	0	0	0	0	0	0	0	0	0
143	12	5F 047	12	2	159	47	2	18.591	0	0	0	0	0	0	0	0	0	0	0	0
144	13	5F 048	12	2	160	50	2	19.5312	0	0	1	1	1	1	1	1	0	6	1	1
145	14	5F 049	12	2	146	40	2	18.7652	0	0	0	0	0	0	0	0	0	0	0	0
146	15	5F 050	13	2	163	82	2	30.863	0	0	0	0	0	0	0	0	0	0	0	0
147	16	5F 051	12	2	137	50.7	2	27.0126	0	0	0	0	0	0	0	0	0	0	0	0
148	17	5F 052	11	2	147	36	2	16.6597	0	0	0	0	0	0	0	0	0	0	0	0
149	18	5F 053	11	2	136	40	2	21.6263	0	0	1	0	0	0	0	0	0	1	0	0
150	19	5F 054	11	2	152	48	2	20.7756	0	0	0	0	0	0	0	0	0	0	0	0
151	20	5F 055	10	2	142	30.4	2	15.0764	0	0	0	0	0	0	0	0	0	0	0	0
152	21	5F 056	11	2	133	35.4	2	20.0124	0	0	0	0	0	0	0	0	0	0	0	0
153	22	5F 057	11	2	134	36	2	20.049	0	0	0	0	0	0	0	0	0	0	0	0
154	23	5F 058	11	2	140	31	2	15.8163	0	0	0	0	0	0	0	0	0	0	0	0
155	24	5F 059	10	2	130	31	2	18.3432	0	0	0	0	0	0	0	0	0	0	0	0
156	25	5F 060	11	2	149	48	2	21.6206	0	0	0	0	0	0	0	0	0	0	0	0
157	26	5F 061	11	2	140	35	2	17.8571	0	0	0	0	0	0	0	0	0	0	0	0
158	27	5F 062	11	2	149	39	2	17.5668	0	0	0	0	0	0	0	0	0	0	0	0
159	28	6F 001	11	2	152	50	2	21.6413	0	0	0	0	0	0	0	0	0	0	0	0
160	29	6F 002	12	2	151	58	2	25.4375	0	0	0	0	0	0	0	0	0	0	0	0
161	30	6F 003	11	2	141	40	2	20.1197	1	1	1	1	1	1	1	1	0	8	1	1
162	31	6F 004	11	2	133	27.5	2	15.5464	1	1	0	0	0	0	0	0	0	2	0	0
163	32	6F 005	12	2	143	47	2	22.984	0	0	0	0	0	0	0	0	0	0	0	0
164	33	6F 006	12	2	163	66	2	24.841	1	1	1	1	1	1	1	1	0	8	1	1
165	34	6F 007	11	2	154	33	2	13.9147	1	1	0	0	1	1	0	0	0	4	1	0
166	35	6F 008	12	2	156	49	2	20.1348	1	1	1	1	1	1	1	1	0	8	1	1
167	36	6F 009	12	2	143	32	2	15.6487	0	0	0	0	0	0	0	0	0	0	0	0
168	37	6F 010	12	2	145	50	2	30.1	0	0	0	0	0	0	0	0	0	0	0	0
169	38	6F 011	12	2	138	42	1	22.0542	0	0	0	0	0	0	0	0	0	0	0	0
170	39	6F 012	12	2	147	54	2	24.9896	0	0	0	0	0	0	0	0	0	0	0	0
171	40	6F 013	12	2	149	36	2	16.2155	0	0	0	0	0	0	0	0	0	0	0	0
172	41	6F 014	11	2	145	41	2	19.5006	0	0	0	0	0	0	0	0	0	0	0	0
173	42	6F 015	12	2	150	49	2	21.7778	0	0	0	0	0	0	0	0	0	0	0	0
174	43	6F 016	12	2	132	43	2	24.6786	0	0	0	0	0	0	0	0	0	0	0	0
175	44	6F 017	11	2	148	48	2	21.9138	0	0	0	0	1	1	1	1	0	4	1	0
176	45	6F 018	12	2	146	41	1	19.2344	0	0	0	0	0	0	0	0	0	0	0	0
177	46	6F 019	11	2	144	31	2	14.9498	1	1	1	1	1	1	1	1	0	8	1	1
178	47	6F 020	11	2	145	49	2	23.3056	0	0	0	0	0	0	0	0	0	0	0	0
179	48	6F 021	11	2	140	28	2	14.2857	0	0	0	0	0	0	0	0	0	0	0	0
180	49	6F 022	11	2	148	35	2	15.9788	0	0	0	0	0	0	0	0	0	0	0	0
181	50	6F 023	11	2	152	53	2	22.9398	0	0	0	0	0	0	0	0	0	0	0	0
182	51	6F 024	11	2	152	50	2	21.6413	0	0	0	0	0	0	0	0	0	0	0	0
183	52	6F 025	11	2	135	34	2	18.6557	0	0	0	0	0	0	0	0	0	0	0	0
184	53	6F 026	11	2	132	24	2	13.7741	0	0	0	0	0	0	0	0	0	0	0	0
185	54	6F 027	10	2	142	51	2	25.2926	0	0	0	0	0	0	0	0	0	0	0	0
186	55	6F 028	10	2	132	37	2	21.2351	0	0	0	0	0	0	0	0	0	0	0	0
187	56	6F 029	11	2	133	26.5	2	14.9811	0	0	0	0	0	0	0	0	0	0	0	0
188	57	6F 030	11	2	128	23	2	14.0381	0	0	0	0	1	1	1	1	0	4	1	0
189	58	6F 031	11	2	135	24	2	13.1687	0	0	0	0	0	0	0	0	0	0	0	0
190	59	6F 032	11	2	135	34	2	18.6557	0	0	0	0	0	0	0	0	0	0	0	0
191	60	6F 033	12	2	148	37	1	16.8919	0	0	0	0	0	0	0	0	0	0	0	0
192	61	6F 034	12	2	143	60	2	29.3413	0	0	0	0	0	0	0	0	0	0	0	0
193	62	6F 035	11	2	157	57	2	23.1247	0	0	0	0	0	0	0	0	0	0	0	0
194	63	6F 036	10	2	143	39	2	19.0718	0	0	0	0	1	1	1	1	1	5	1	0
195	64	6F 037	11	2	140	34	2	17.3469	0	0	1	1	1	1	1	1	0	6	1	1
196	65	6F 038	10	2	141	28	1	29	1	1	1	1	1	1	1	1	0	8	1	1
197	66	6F 039	10	2	139	29	2	15.0096	0	0	0	0	0	0	0	0	0	0	0	0
198	67	6F 040	10	2	123	22	2	14.5416	0	0	0	0	0	0	0	0	0	0	0	0
199	68	6F 041	11	2	149	41	2	18.4676	0	0	0	0	0	0	0	0	0	0	0	0
200	69	6F 042	12	2	146	45	2	21.1109	0	0	0	0	0	0	0	0	0	0	0	0
201	70	6F 043	12	2	146	62	2	29.0861	0	0	0	0	0	0	0	0	0	0	0	0
202	71	6F 044	9	2	130	26	2	15.3846	0	0	0	0	0	0	0	0	0	0	0	0
203	72	6F 045	9	2	136	45	2	24.3296	0	0	0	0	0	0	0	0	0	0	0	0
204	73	6F 046	9	2	154	39	2	16.4446	0	0	1	1	1	1	1	1	0	6	1	1
205	74	6F 047	9	2	127	23	2	14.26	0	0	1	1	0	0	0	0	0	2	0	0
206	75	6F 048	9	2	125	26.5	2	16.96	0	0	0	0	0	0	0	0	0	0	0	0
207	76	6F 049	9	2	126	26.3	2	16.5659	0	0	0	0	0	0	0	0	0	0	0	0
208	77	6F 050	9	2	128	33.5	2	20.4468	0	0	0	0	0	0	0	0	0	0	0	0
209	78	6F 051	9	2	144	35	2	16.8789	0	0	1	1	1	1	1	1	0	6	1	1
210	79	6F 052	9	2	126	24.5	2	15.4321	1	1	1	1	1	1	1	1	0	8	1	1
211	80	6F 053	9	2	134	28	2	15.5937	0	0	1	1	1	1	0	0	0	4	1	0
212	81	6F 054	9	2	134	26	2	14.4798	0	0	1	1	1	1	1	1	1	7	1	1
213	82	6F 055	9	2	130	33	1	19.5266	0	0	0	0	0	0	0	0	0	0	0	0
214	113	4F 046	8	2	132	39	2	22.3829	0	0	0	0	0	0	0	0	0	0	0	0
215	114	4F 047	8	2	118	19	2	13.6455	0	0	0	0	0	0	0	0	0	0	0	0
216	115	4F 048	9	2	117	22.5	2	16.4366	0	0	0	0	0	0	0	0	0	0	0	0
217	116	4F 049	8	2	120	24	2	16.6667	0	0	0	0	0	0	0	0	0	0	0	0
218	117	4F 050	8	2	118	20	2	14.3637	1	1	1	1	1	1	0	0	0	6	1	1
219	118	4F 051	10	2	137	36	2	19.1806	0	0	0	0	0	0	0	0	0	0	0	0
220	119	4F 052	10	2	128	29	2	17.7002	0	0	1	1	0	0	0	0	0	2	0	0
221	120	4F 053	9	2	130	39	2	23.0769	0	0	0	0	0	0	0	0	0	0	0	0
222	121	4F 054	10	2	131	30	2	17.4815	0	0	0	0	0	0	0	0	0	0	0	0
223	122	4F 055	10	2	131	30	2	17.4815	0	0	0	0	0	0	0	0	0	0	0	0
224	123	4F 056	10	2	140	30	2	15.3061	0	0	0	0	0	0	0	0	0	0	0	0
225	124	4F 057	10	2	127	23.5	2	14.57	0	0	0	0	0	0	0	0	0	0	0	0
226	125	4F 058	10	2	130	26.5	2	15.6805	0	0	0	0	0	0	0	0	0	0	0	0
227	126	4F 059	10	2	137	25	2	13.3198	0	0	0	0	0	0	0	0	0	0	0	0
228	127	4F 060	10	2	135	42.5	2	23.3196	0	0	0	0	0	0	0	0	0	0	0	0
229	128	4F 061	8	2	120	23	2	15.9722	0	0	0	0	0	0	0	0	0	0	0	0
230	129	4F 062	10	2	140	42	2	21.4286	0	0	0	0	0	0	0	0	0	0	0	0
231	130	4F 063	8	2	131	27	2	15.7333	1	1	1	1	1	1	0	0	0	6	1	1
232	131	5F 027	12	2	149	74	2	33.3318	0	0	1	1	0	0	0	0	0	2	0	0
233	132	5F 028	12	2	149	38.7	2	17.4316	0	0	1	1	0	0	0	0	0	2	0	0
234	133	5F 029	12	2	152	54.5	2	23.589	0	0	0	0	0	0	0	0	0	0	0	0
235	134	5F 030	12	2	142	30.7	2	15.2252	0	0	1	1	0	0	1	0	0	3	0	0
236	135	5F 031	13	2	152	67.9	2	29.3889	0	0	0	0	0	0	0	0	0	0	0	0
237	136	5F 032	13	2	157	78	2	31.6443	0	0	0	0	0	0	0	0	0	0	0	0
238	137	5F 033	12	2	154	44.5	2	18.7637	0	0	0	0	0	0	0	0	0	0	0	0
239	138	5F 034	12	2	140	33	2	16.8367	0	0	0	0	0	0	0	0	0	0	0	0
240	139	5F 035	12	2	145	39	2	18.5493	1	1	1	1	1	1	0	0	0	6	1	1
241	140	4F 020	9	2	130	28	2	16.568	0	0	0	0	0	0	0	0	0	0	0	0
242	141	4F 021	9	2	127	23	2	14.26	0	0	0	0	0	0	0	0	0	0	0	0
243	142	4F 022	9	2	127	22.5	2	13.95	0	0	0	0	0	0	0	0	0	0	0	0
244	143	4F 023	9	2	132	31	2	17.7916	0	0	1	1	1	1	1	1	0	6	1	1
245	144	4F 024	9	2	137	39	2	20.7789	0	0	0	0	0	0	0	0	0	0	0	0
246	145	4F 025	9	2	119	20	2	14.1233	0	0	0	0	0	0	0	0	0	0	0	0
247	146	4F 026	9	2	132	24	2	13.7741	1	1	1	1	1	1	1	1	0	8	1	1
248	147	4F 027	10	2	138	43.5	2	22.8418	0	0	0	0	0	0	0	0	0	0	0	0
249	148	4F 028	10	2	127	38	2	23.56	1	0	1	0	1	1	0	0	0	4	1	0
250	149	4F 029	10	2	127	28	2	17.36	0	0	0	0	0	0	0	0	0	0	0	0
251	150	4F 030	9	2	138	64	2	33.6064	0	0	0	0	0	0	0	0	0	0	0	0
252	151	4F 031	9	2	124	27	2	17.5598	0	0	1	1	0	0	0	0	0	2	0	0
253	152	4F 032	9	2	126	21	2	13.2275	0	0	0	0	0	0	0	0	0	0	0	0
254	153	4F 033	9	2	132	36	2	20.6612	0	0	0	0	0	0	0	0	0	0	0	0
255	154	4F 034	10	2	126	20	2	12.5976	0	0	1	1	1	1	0	0	0	4	1	0
256	155	4F 035	9	2	129	24	2	14.4222	0	0	0	0	0	0	0	0	0	0	0	0
257	156	4F 036	10	2	141	38	2	19.1137	0	0	0	0	0	0	0	0	0	0	0	0
258	157	4F 037	10	2	143	32	2	15.6487	0	0	0	0	0	0	0	0	0	0	0	0
259	158	4F 038	9	2	136	44	2	23.7889	0	0	0	0	0		0	0	0	0	0	0
260	159	4F 039	9	2	132	37	2	21.2351	0	0	0	0	0	0	0	0	0	0	0	0
261	160	4F 001	10	2	142	44	2	21.8211	0	0	1	1	1	1	0	0	0	4	1	0
262	161	4F 002	10	2	138	30	2	15.753	0	0	0	0	0	0	0	0	0	0	0	0
263	162	4F 003	10	2	143	42	2	20.5389	0	0	0	0	0	0	0	0	0	0	0	0
264	163	4F 004	11	2	145	37	2	17.5981	0	0	0	0	0	0	0	0	0	0	0	0
265	164	4F 005	11	2	143	36	2	17.6048	0	0	0	0	0	0	0	0	0	0	0	0
266	165	4F 006	10	2	140	32	2	16.3265	0	0	0	0	0	0	0	0	0	0	0	0
267	166	4F 008	11	2	149	49	2	22.0711	0	0	0	0	0	0	0	0	0	0	0	0
268	167	4F 009	10	2	140	45	2	22.9592	0	0	0	0	0	0	0	0	0	0	0	0
269	168	4F 010	11	2	147	47	2	21.7502	0	0	0	0	0	0	0	0	0	0	0	0
270	169	4F 011	11	2	138	41	2	21.5291	0	0	0	0	0	0	0	0	0	0	0	0
271	170	4F 012	10	2	128	27	2	16.4795	0	0	0	0	0	0	0	0	0	0	0	0
272	171	4F 013	11	2	145	40	2	19.025	0	0	0	0	0	0	0	0	0	0	0	0
273	172	4F 014	10	2	156	62	2	25.4767	0	0	0	0	0	0	0	0	0	0	0	0
274	173	4F 015	10	2	130	24	2	14.2012	0	0	0	0	0		0	0	0	0	0	0
275	174	4F 016	12	2	157	42	2	17.0392	0	0	0	0	0	0	0	0	0	0	0	0
276	175	4F 017	12	2	149	59	2	26.5754	0	0	0	0	0	0	0	0	0	0	0	0
277	176	4F 018	12	2	138	30	2	15.753	0	0	0	0	0	0	0	0	0	0	0	0
278	177	4F 019	12	2	153	54	2	23.0681	0	0	0	0	0	0	0	0	0	0	0	0
279	11	KS M 015	12	1	141	32.4	2	16.297	0	0	0	0	0	0	0	0	0	0	0	0
280	12	KS M 021	8	1	113	17.2	2	13.4701	0	0	0	0	0	0	0	0	0	0	0	0
281	13	KS M 026	11	1	134.5	32	2	17.6891	0	0	0	0	0	0	0	0	0	0	0	0
282	14	KS M 027	11	1	134	32.6	2	18.1555	0	0	0	0	0	0	0	0	0	0	0	0
283	15	KS M 028	11	1	133	31.4	2	17.7511	0	0	0	0	0	0	0	0	0	0	0	0
284	16	KS M 025	12	1	149	34	2	15.3146	0	0	0	0	0	0	0	0	0	0	0	0
285	17	KS M 029	11	1	131	34.5	2	20.1037	0	0	0	0	0	0	0	0	0	0	0	0
286	18	KS M 018	13	1	152.5	65	1	27.9495	0	0	0	0	0	0	0	0	0	0	0	0
287	19	KS M 019	12	1	138.5	27.3	2	14.2319	0	0	0	0	0	0	0	0	0	0	0	0
288	20	KS M 024	12	1	142.5	36.8	2	18.1225	0	0	0	0	0	0	0	0	0	0	0	0
289	21	KS M 039	11	1	132.5	28	2	15.9487	0	0	0	0	0	0	0	0	0	0	0	0
290	150	4F 030	9	2	138	64	2	33.6064	0	0	0	0	0	0	0	0	0	0	0	0
291	151	4F 031	9	2	124	27	2	17.5598	0	0	1	1	0	0	0	0	0	2	0	0
292	152	4F 032	9	2	126	21	2	13.2275	0	0	0	0	0	0	0	0	0	0	0	0
293	153	4F 033	9	2	132	36	2	20.6612	0	0	0	0	0	0	0	0	0	0	0	0
294	154	4F 034	10	2	126	20	2	12.5976	0	0	1	1	1	1	0	0	0	4	1	0
295	155	4F 035	9	2	129	24	2	14.4222	0	0	0	0	0	0	0	0	0	0	0	0
296	156	4F 036	10	2	141	38	2	19.1137	0	0	0	0	0	0	0	0	0	0	0	0
297	157	4F 037	10	2	143	32	2	15.6487	0	0	0	0	0	0	0	0	0	0	0	0
298	158	4F 038	9	2	136	44	2	23.7889	0	0	0	0	0		0	0	0	0	0	0
299	159	4F 039	9	2	132	37	2	21.2351	0	0	0	0	0	0	0	0	0	0	0	0
300	160	4F 001	10	2	142	44	2	21.8211	0	0	1	1	1	1	0	0	0	4	1	0
301	161	4F 002	10	2	138	30	2	15.753	0	0	0	0	0	0	0	0	0	0	0	0
302	162	4F 003	10	2	143	42	2	20.5389	0	0	0	0	0	0	0	0	0	0	0	0
303	163	4F 004	11	2	145	37	2	17.5981	0	0	0	0	0	0	0	0	0	0	0	0

## Sheet: CODES
Gender
1	Male
2	Female
Hand Dominance
1	Left
2	Right
Other cells
0	Absent
1	Present
